# Supplementary material for: Association between Breastmilk LC PUFA, Carotenoids and Psychomotor Development of Exclusively Breastfed Infants
Source: PubMed Central journal article supplement (PMC6479893; doi:10.3390/ijerph16071144), 2019-03-30

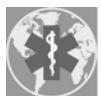

Article

# Association between breastmilk LC PUFA, carotenoids and psychomotor development of exclusively breastfed infants

Monika A. Zielinska <sup>1</sup>, Jadwiga Hamulka <sup>1\*</sup>, Iwona Grabowicz-Chądrzyńska <sup>2</sup>, Joanna Bryś <sup>3</sup>, Aleksandra Wesolowska <sup>4</sup>

**Table S1.** Results of the linear regression models of the associations between breastmilk nutrients and the results of DSR Performance subscales.

| DSR <sup>1</sup> subscale | Breastmilk nutrients | Model 1                        |                | Model 2                        |                | Model 3                        |                |
|---------------------------|----------------------|--------------------------------|----------------|--------------------------------|----------------|--------------------------------|----------------|
|                           |                      | $\beta$ (95% CI <sup>2</sup> ) | R <sup>2</sup> | $\beta$ (95% CI <sup>2</sup> ) | R <sup>2</sup> | $\beta$ (95% CI <sup>2</sup> ) | R <sup>2</sup> |
| Manipulation              | LA <sup>3</sup>      | -0.180 (-0.507 - 0.148)        | 0.03           | -0.048 (-0.424 - 0.328)        | 0.16           | -0.071 (-0.472 - 0.330)        | 0.17           |
|                           | ALA <sup>4</sup>     | -0.289 (-0.608 - 0.030)        | 0.08           | -0.181 (-0.595 - 0.232)        | 0.18           | -0.233 (-0.701 - 0.236)        | 0.19           |
|                           | AA <sup>5</sup>      | -0.190 (-0.517 - 0.137)        | 0.04           | -0.199 (-0.552 - 0.153)        | 0.19           | -0.218 (-0.590 - 0.153)        | 0.21           |
|                           | EPA <sup>6</sup>     | 0.069 (-0.310 - 0.448)         | 0.01           | 0.088 (-0.285 - 0.461)         | 0.16           | 0.158 (-0.240 - 0.556)         | 0.18           |
|                           | DHA <sup>7</sup>     | -0.179 (-0.507 - 0.149)        | 0.03           | -0.162 (-0.519 - 0.194)        | 0.18           | -0.231 (-0.645 - 0.183)        | 0.20           |
|                           | LC-PUFA <sup>8</sup> | -0.211 (-0.536 - 0.116)        | 0.04           | -0.08 (-0.457 - 0.303)         | 0.16           | -0.105 (-0.512 - 0.303)        | 0.17           |
|                           | n-3 LC-PUFA          | -0.281 (-0.601 - 0.039)        | 0.08           | -0.189 (-0.571 - 0.194)        | 0.18           | -0.260 (-0.706 - 0.186)        | 0.21           |
|                           | n-6 LC-PUFA          | -0.176 (-0.503 - 0.152)        | 0.03           | -0.049 (-0.422 - 0.324)        | 0.16           | -0.074 (-0.472 - 0.324)        | 0.17           |
|                           | n-6/n-3 ratio        | 0.149 (-0.181 - 0.478)         | 0.02           | 0.125 (-0.230 - 0.481)         | 0.17           | 0.153 (-0.243 - 0.549)         | 0.18           |
|                           | AA/DHA ratio         | 0.069 (-0.268 - 0.406)         | 0.00           | 0.006 (-0.361 - 0.372)         | 0.15           | 0.066 (-0.362 - 0.494)         | 0.17           |
|                           | $\beta$ -carotene    | -0.185 (-0.512 - 0.143)        | 0.03           | -0.288 (-0.639 - 0.064)        | 0.23           | -0.278 (-0.667 - 0.111)        | 0.22           |
|                           | Lycopene             | 0.348 (0.036 - 0.660) *        | 0.12 *         | -0.303 (-0.662 - 0.056)        | 0.23           | -0.306 (-0.685 - 0.074)        | 0.24           |
|                           | L + Z <sup>9</sup>   | -0.140 (-0.470 - 0.190)        | 0.02           | -0.144 (-0.512 - 0.223)        | 0.17           | -0.144 (-0.543 - 0.255)        | 0.18           |
| Perception                | LA <sup>3</sup>      | -0.239 (-0.563 - 0.084)        | 0.06           | -0.274 (-0.626 - 0.078)        | 0.26           | -0.307 (-0.661 - 0.046)        | 0.35           |
|                           | ALA <sup>4</sup>     | -0.195 (-0.521 - 0.132)        | 0.04           | -0.224 (-0.623 - 0.175)        | 0.24           | -0.128 (-0.569 - 0.312)        | 0.29           |
|                           | AA <sup>5</sup>      | -0.162 (-0.491 - 0.167)        | 0.03           | -0.101 (-0.449 - 0.248)        | 0.21           | -0.141 (-0.491 - 0.209)        | 0.29           |
|                           | EPA <sup>6</sup>     | -0.032 (-0.365 - 0.301)        | 0.00           | 0.075 (-0.288 - 0.438)         | 0.21           | 0.222 (-0.142 - 0.586)         | 0.32           |
|                           | DHA <sup>7</sup>     | 0.381 (0.073 - 0.689) *        | 0.15 *         | 0.316 (0.015 - 0.648) *        | 0.29 *         | -0.235 (-0.618 - 0.148)        | 0.32           |
|                           | LC-PUFA <sup>8</sup> | -0.288 (-0.607 - 0.031)        | 0.08           | -0.315 (-0.667 - 0.036)        | 0.28           | -0.332 (-0.690 - 0.026)        | 0.36           |
|                           | n-3 LC-PUFA          | -0.305 (-0.622 - 0.012)        | 0.09           | -0.292 (-0.654 - 0.071)        | 0.27           | -0.187 (-0.606 - 0.232)        | 0.30           |
|                           | n-6 LC-PUFA          | -0.248 (-0.571 - 0.075)        | 0.06           | -0.274 (-0.623 - 0.075)        | 0.26           | -0.313 (-0.663 - 0.037)        | 0.36           |
|                           | n-6/n-3 ratio        | 0.084 (-0.248 - 0.416)         | 0.01           | 0.006 (-0.343 - 0.355)         | 0.20           | -0.135 (-0.503 - 0.234)        | 0.29           |
|                           | AA/DHA ratio         | 0.257 (-0.069 - 0.584)         | 0.07           | 0.276 (-0.055 - 0.607)         | 0.31           | 0.230 (-0.158 - 0.618)         | 0.31           |
|                           | $\beta$ -carotene    | 0.027 (-0.306 - 0.360)         | 0.00           | -0.061 (-0.418 - 0.296)        | 0.20           | 0.007 (-0.368 - 0.382)         | 0.28           |
|                           | Lycopene             | -0.003 (-0.336 - 0.330)        | 0.00           | 0.013 (-0.353 - 0.380)         | 0.20           | -0.011 (-0.381 - 0.360)        | 0.28           |
|                           | L + Z <sup>9</sup>   | 0.195 (-0.132 - 0.522)         | 0.04           | 0.117 (-0.242 - 0.475)         | 0.21           | 0.176 (-0.192 - 0.544)         | 0.30           |
| Memory                    | LA <sup>3</sup>      | 0.194 (-0.133 - 0.520)         | 0.04           | 0.275 (-0.087 - 0.637)         | 0.22           | 0.276 (-0.118 - 0.669)         | 0.20           |
|                           | ALA <sup>4</sup>     | 0.185 (-0.143 - 0.512)         | 0.03           | 0.267 (-0.140 - 0.674)         | 0.20           | 0.340 (-0.126 - 0.806)         | 0.20           |
|                           | AA <sup>5</sup>      | 0.157 (-0.172 - 0.482)         | 0.02           | 0.224 (-0.126 - 0.575)         | 0.20           | 0.219 (-0.159 - 0.596)         | 0.18           |
|                           | EPA <sup>6</sup>     | -0.223 (-0.548 - 0.101)        | 0.05           | -0.164 (-0.533 - 0.205)        | 0.18           | -0.102 (-0.509 - 0.305)        | 0.15           |
|                           | DHA <sup>7</sup>     | 0.063 (-0.270 - 0.395)         | 0.00           | 0.179 (-0.18 - 0.535)          | 0.18           | 0.244 (-0.176 - 0.663)         | 0.18           |
|                           | LC-PUFA <sup>8</sup> | 0.203 (-0.123 - 0.529)         | 0.04           | 0.3049 (-0.059 - 0.667)        | 0.23           | 0.315 (-0.083 - 0.712)         | 0.21           |
|                           | n-3 LC-PUFA          | 0.150 (-0.180 - 0.479)         | 0.02           | 0.247 (-0.131 - 0.625)         | 0.20           | 0.342 (-0.103 - 0.786)         | 0.21           |
|                           | n-6 LC-PUFA          | 0.197 (-0.130 - 0.523)         | 0.04           | 0.279 (-0.080 - 0.638)         | 0.22           | 0.278 (-0.112 - 0.668)         | 0.20           |
|                           | n-6/n-3 ratio        | 0.026 (-0.307 - 0.359)         | 0.00           | -0.000 (-0.359 - 0.358)        | 0.16           | -0.015 (-0.422 - 0.392)        | 0.14           |
|                           | AA/DHA ratio         | -0.021 (-0.359 - 0.317)        | 0.00           | -0.049 (-0.419 - 0.322)        | 0.13           | -0.023 (-0.458 - 0.413)        | 0.14           |
|                           | $\beta$ -carotene    | 0.308 (-0.009 - 0.625)         | 0.09           | 0.256 (-0.100 - 0.611)         | 0.21           | 0.343 (-0.045 - 0.730)         | 0.23           |
|                           | Lycopene             | -0.106 (-0.437 - 0.226)        | 0.01           | -0.155 (-0.527 - 0.217)        | 0.18           | -0.162 (-0.562 - 0.238)        | 0.16           |
|                           | L + Z <sup>9</sup>   | 0.097 (-0.234 - 0.429)         | 0.01           | -0.016 (-0.387 - 0.355)        | 0.16           | -0.004 (-0.413 - 0.406)        | 0.14           |

|                     |                                |                         |      |                          |      |                         |      |
|---------------------|--------------------------------|-------------------------|------|--------------------------|------|-------------------------|------|
| Speech and language | LA <sup>3</sup>                | -0.254 (-0.576 - 0.068) | 0.06 | -0.313 (-0.675 - 0.049)  | 0.22 | -0.263 (-0.617 - 0.092) | 0.23 |
|                     | ALA <sup>4</sup>               | -0.291 (-0.610 - 0.028) | 0.09 | -0.259 (-0.671 - 0.153)  | 0.18 | -0.163 (-0.597 - 0.271) | 0.20 |
|                     | AA <sup>5</sup>                | 0.111 (-0.220 - 0.420)  | 0.01 | 0.157 (-0.202 - 0.516)   | 0.16 | 0.172 (-0.172 - 0.516)  | 0.18 |
|                     | EPA <sup>6</sup>               | -0.127 (-0.458 - 0.203) | 0.02 | -0.206 (-0.576 - 0.164)  | 0.17 | -0.239 (-0.597 - 0.119) | 0.19 |
|                     | DHA <sup>7</sup>               | -0.121 (-0.452 - 0.210) | 0.01 | -0.043 (-0.408 - 0.322)  | 0.17 | -0.195 (-0.576 - 0.187) | 0.19 |
|                     | LC-PUFA <sup>8</sup>           | -0.254 (-0.576 - 0.068) | 0.06 | -0.311 (-0.677 - 0.056)  | 0.22 | -0.253 (-0.616 - 0.109) | 0.23 |
|                     | <i>n</i> -3 LC-PUFA            | -0.270 (-0.591 - 0.051) | 0.07 | -0.268 (-0.648 - 0.113)  | 0.19 | -0.221 (-0.632 - 0.190) | 0.21 |
|                     | <i>n</i> -6 LC-PUFA            | -0.241 (-0.563 - 0.083) | 0.06 | -0.300 (-0.657 - 0.065)  | 0.21 | -0.246 (-0.599 - 0.108) | 0.23 |
|                     | <i>n</i> -6/ <i>n</i> -3 ratio | 0.090 (-0.241 - 0.422)  | 0.01 | 0.036 (-0.326 - 0.398)   | 0.14 | -0.022 (-0.390 - 0.345) | 0.16 |
|                     | AA/DHA ratio                   | 0.231 (-0.098 - 0.560)  | 0.05 | 0.287 (-0.065 - 0.640)   | 0.22 | 0.363 (-0.004 - 0.730)  | 0.25 |
|                     | β-carotene                     | 0.108 (-0.223 - 0.439)  | 0.01 | 0.152 (-0.215 - 0.519)   | 0.16 | 0.053 (-0.318 - 0.423)  | 0.19 |
|                     | Lycopene                       | -0.014 (-0.347 - 0.319) | 0.00 | 0.049 (-0.331 - 0.429)   | 0.14 | 0.040 (-0.326 - 0.405)  | 0.15 |
|                     | L + Z <sup>9</sup>             | 0.128 (-0.203 - 0.458)  | 0.02 | 0.164 (-0.206 - 0.534)   | 0.16 | 0.077 (-0.292 - 0.446)  | 0.18 |
| Social behaviour    | LA <sup>3</sup>                | 0.009 (-0.324 - 0.342)  | 0.00 | 0.116 (-0.262 - 0.494)   | 0.15 | 0.149 (-0.247 - 0.544)  | 0.19 |
|                     | ALA <sup>4</sup>               | -0.060 (-0.393 - 0.273) | 0.00 | 0.017 (-0.407 - 0.441)   | 0.14 | 0.076 (-0.398 - 0.550)  | 0.17 |
|                     | AA <sup>5</sup>                | 0.110 (-0.221 - 0.441)  | 0.01 | 0.055 (-0.309 - 0.419)   | 0.14 | 0.066 (-0.313 - 0.444)  | 0.18 |
|                     | EPA <sup>6</sup>               | 0.131 (-0.200 - 0.461)  | 0.02 | 0.098 (-0.279 - 0.474)   | 0.15 | 0.080 (-0.320 - 0.479)  | 0.18 |
|                     | DHA <sup>7</sup>               | 0.008 (-0.325 - 0.341)  | 0.00 | -0.043 (-0.408 - 0.322)  | 0.14 | -0.045 (-0.466 - 0.376) | 0.17 |
|                     | LC-PUFA <sup>8</sup>           | 0.005 (-0.328 - 0.338)  | 0.00 | 0.102 (-0.281 - 0.485)   | 0.15 | 0.140 (-0.264 - 0.544)  | 0.19 |
|                     | <i>n</i> -3 LC-PUFA            | -0.034 (-0.367 - 0.299) | 0.00 | -0.005 (-0.399 - 0.388)  | 0.14 | 0.0345 (-0.420 - 0.489) | 0.17 |
|                     | <i>n</i> -6 LC-PUFA            | 0.015 (-0.318 - 0.348)  | 0.00 | 0.113 (-0.262 - 0.489)   | 0.15 | 0.146 (-0.246 - 0.539)  | 0.19 |
|                     | <i>n</i> -6/ <i>n</i> -3 ratio | 0.096 (-0.235 - 0.428)  | 0.01 | 0.149 (-0.209 - 0.507)   | 0.16 | 0.149 (-0.245 - 0.543)  | 0.19 |
|                     | AA/DHA ratio                   | 0.205 (-0.126 - 0.536)  | 0.04 | 0.177 (-0.187 - 0.541)   | 0.16 | 0.228 (-0.189 - 0.645)  | 0.20 |
|                     | β-carotene                     | 0.422 (0.120 - 0.724)   | 0.18 | 0.478 (0.151 - 0.804)    | 0.34 | 0.460 (0.102 - 0.819)   | 0.34 |
|                     | Lycopene                       | 0.012 (-0.321 - 0.345)  | 0.01 | 0.090 (-0.292 - 0.466)   | 0.14 | 0.084 (-0.311 - 0.479)  | 0.18 |
|                     | L + Z <sup>9</sup>             | 0.258 (-0.064 - 0.580)  | 0.07 | 0.406 (0.062 - 0.749)    | 0.27 | 0.381 (0.009 - 0.752)   | 0.29 |
| Total result        | LA <sup>3</sup>                | -0.167 (-0.500 - 0.167) | 0.03 | -0.0912 (-0.486 - 0.303) | 0.11 | -0.074 (-0.482 - 0.335) | 0.14 |
|                     | ALA <sup>4</sup>               | -0.075 (-0.412 - 0.262) | 0.01 | 0.518 (0.175 - 0.861)    | 0.11 | 0.184 (-0.297 - 0.665)  | 0.15 |
|                     | AA <sup>5</sup>                | 0.048 (-0.290 - 0.386)  | 0.00 | 0.069 (-0.310 - 0.448)   | 0.11 | 0.077 (-0.310 - 0.464)  | 0.14 |
|                     | EPA <sup>6</sup>               | -0.051 (-0.389 - 0.286) | 0.00 | -0.000 (-0.400 - 0.400)  | 0.10 | -0.014 (-0.424 - 0.396) | 0.13 |
|                     | DHA <sup>7</sup>               | -0.179 (-0.511 - 0.153) | 0.03 | -0.170 (-0.542 - 0.202)  | 0.13 | -0.235 (-0.657 - 0.186) | 0.17 |
|                     | LC-PUFA <sup>8</sup>           | -0.169 (-0.502 - 0.164) | 0.03 | -0.166 (-0.516 - 0.184)  | 0.11 | -0.063 (-0.480 - 0.354) | 0.13 |
|                     | <i>n</i> -3 LC-PUFA            | -0.133 (-0.468 - 0.202) | 0.02 | -0.000 (-0.411 - 0.410)  | 0.10 | 0.008 (-0.458 - 0.474)  | 0.13 |
|                     | <i>n</i> -6 LC-PUFA            | -0.162 (-0.495 - 0.172) | 0.03 | -0.089 (-0.480 - 0.303)  | 0.11 | -0.070 (-0.476 - 0.335) | 0.14 |
|                     | <i>n</i> -6/ <i>n</i> -3 ratio | -0.000 (-0.338 - 0.338) | 0.00 | -0.069 (-0.445 - 0.307)  | 0.11 | -0.077 (-0.485 - 0.198) | 0.14 |
|                     | AA/DHA ratio                   | 0.230 (-0.099 - 0.559)  | 0.05 | 0.224 (-0.144 - 0.592)   | 0.15 | 0.204 (-0.092 - 0.743)  | 0.19 |
|                     | β-carotene                     | 0.348 (0.036 - 0.660)   | 0.18 | 0.404 (0.047 - 0.7602)   | 0.24 | 0.383 (0.000 - 0.765)   | 0.25 |
|                     | Lycopene                       | -0.218 (-0.548 - 0.112) | 0.05 | -0.164 (-0.555 - 0.227)  | 0.12 | -0.164 (-0.564 - 0.237) | 0.15 |
|                     | L + Z <sup>9</sup>             | 0.280 (-0.045 - 0.604)  | 0.08 | 0.316 (-0.055 - 0.687)   | 0.19 | 0.287 (-0.107 - 0.682)  | 0.20 |

<sup>1</sup> DSR – Children Development Scale; <sup>2</sup> CI – confidence intervals; <sup>3</sup> LA – linoleic acid; <sup>4</sup> ALA – α-linolenic acid; <sup>5</sup> AA – arachidonic acid; <sup>6</sup> EPA – eicosapentaenoic acid; <sup>7</sup> DHA – docosahexaenoic acid; <sup>8</sup> LC PUFA – long chain polyunsaturated fatty acids; <sup>9</sup> L + Z – lutein + zeaxanthin; **Model 1**: unadjusted model; **Model 2**: adjusted for infant age and gender, maternal age, education and psychological status; **Model 3**: model 2 adjusted for birthweight and parity; \*  $p \leq 0.05$ .

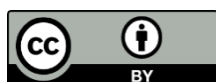

Supplement: ijerph-16-01144-s001.pdf [file ijerph-16-01144-s001.pdf]
